1 **Prevalence of intraventricular haemorrhage and determinants of its early outcomes among**  
2 **preterm neonates at the newborn unit of a teaching hospital in Western Kenya**

3  
4 Gloria Namubuya Sisenda<sup>1\*</sup>, Festus Muigai Njuguna<sup>1,2</sup>, Winstone Mokaya Nyandiko<sup>1,2</sup>.

5  
6 **Author Affiliation:**

7 1. Department of Child health and Paediatrics, Moi University College of Health Sciences  
8 2. Academic Model Providing Access to Healthcare, Eldoret, Kenya  
9

10 **\* Corresponding Author:**

11 Dr. Gloria Namubuya Sisenda

12 Department of Child health and Paediatrics, Moi University College of Health Sciences

13 P.O Box 4606-30100, Eldoret-Kenya.

14 Tel: +254723968424

15 Email: [gnsisenda@gmail.com](mailto:gnsisenda@gmail.com)

16

17 **Running Head:** Determinant of intraventricular haemorrhage among neonates in Western Kenya.

## 18 **ABSTRACT**

19 Intraventricular haemorrhage (IVH) screened using cranial ultrasounds (cUS) is a major cause of  
20 morbidity and mortality among preterm neonates. Despite the adverse neonatal outcomes  
21 attributed to IVH, there are limited studies conducted in sub-Saharan Africa on IVH occurrence  
22 and determinants of early outcomes. This study assessed the proportion of neonates with IVH, its  
23 determinants and the early outcomes of preterm neonates with the condition. A prospective  
24 descriptive study conducted at the newborn unit of Moi Teaching and Referral Hospital in Western  
25 Kenya between March 2020 to March 2021. The neonates sampled systematically had their clinical  
26 characteristics and that of their mothers collected from medical records. A cUS screening was  
27 conducted on the third and fourteenth day of life while hydrocephalus was screened using serial  
28 weekly measurements of head circumference and mortality assessed within the first 28 days of  
29 life. Bivariate analysis was used to test for an association between patient characteristics,  
30 occurrence of IVH and early outcomes. Confounders were controlled using a multivariate logistic  
31 regression model. We enrolled 201 pre-term neonates of whom 105 (52.2%) were male and 68  
32 (33.8%) had IVH. Among neonates with IVH, 46 (67.6%) had mild while 22 (32.4%) had severe  
33 IVH. Antenatal steroids significantly reduced the risk of IVH while extreme/very low gestational  
34 age and extremely low birthweight significantly increased the risk of IVH two and three-fold  
35 respectively. Neonates with thrombocytopenia and on mechanical ventilation were significantly  
36 more likely to be diagnosed with IVH. Early outcomes of IVH were hydrocephalus (4.0%) and  
37 mortality (19.1%). Intraventricular haemorrhage was seen in one-third of neonates enrolled with  
38 majority of them presenting with the lower IVH grades. The IVH risk significantly increased  
39 among neonates with very low gestational age and extremely low birthweight but was lowered by  
40 antenatal steroid use. Mortality rates were significantly higher among neonates with  
41 thrombocytopenia.

## 42 **Background**

43 Preterm neonates with a very low birthweight are at risk of health problems at birth and mortality  
44 in the first four weeks of life [1]. For those who survive, there is an increased risk of long-term  
45 disabling neurological consequences or neurological problems that could interfere with achieving  
46 their developmental milestones and learning [2]. Several factors predispose these preterm neonates  
47 with very low birthweight to these complications. A major contributing factor to morbidity and  
48 mortality among one in five preterm newborns (below 32 weeks gestation) is intraventricular  
49 haemorrhage (IVH). This condition is multifactorial in nature and is often reported in cases of  
50 fibronectin deficiency in the germinal matrix basal lamina [3]. Intraventricular haemorrhage  
51 pathogenesis is associated with irregularities in cerebral blood flow, coagulation and platelet  
52 abnormalities that worsen the bleeding making this very critical infant in the integrity of the

53 germinal matrix [4,5]. Some of the etiological risk factors for IVH include very low birthweight  
54 (<1500 grammes), very low to extremely low gestational age (< 32 weeks), absence of prenatal  
55 corticosteroid use for women at risk of premature mature delivery [2] and early clamping of the  
56 umbilical cord [6].

57 Prematurity is a leading cause of death in children below the age of five years with more than half  
58 of those born with a gestation age below 32 weeks dying in countries with low income such as  
59 those in the sub-Saharan Africa region [7]. With the high burden of prematurity, neonatal  
60 morbidity and infant mortality in countries with low- and middle-income economies, health  
61 conditions such as intraventricular haemorrhage further compound the problem in an already weak  
62 healthcare system. It is estimated that the neonatal mortality rate in sub-Saharan Africa is 27 per  
63 1000 live births and 21 per 1000 live births in Kenya [8]. This is despite the United Nations  
64 sustainable development goal 3.2 which aims to reduce the neonatal mortality in all countries to  
65 12 per 1000 live births [9]. Because of this and the high interest in child health evidenced by  
66 national strategies has led to an increased investment and development in neonatal care so as to  
67 improve survival rates [10]. The resulting high number of preterm, very low birth weight (VLBW)  
68 and extremely low birth weight (ELBW) newborns increases the risk of intracranial bleeding  
69 occurring, and intraventricular haemorrhage (IVH) in particular; with neonates born <32 weeks  
70 gestation age (GA) or <1500g being more susceptible [11,12]. While IVH contributes significantly  
71 to poor outcomes in mortality, morbidity, cognitive and motor neurological development, there is  
72 little data in its incidence, risk factors and complications in LICs as compared to high income  
73 countries [12]. This limited knowledge is in part because there have been few studies on IVH and  
74 its implications on the wellbeing of preterm and low birthweight newborns in sub-Saharan Africa.  
75 Furthermore, the cost of routine monitoring coupled with the systemic infrastructural inadequacy

76 compound the problem further thus interfering with the ability to conduct a comprehensive  
77 surveillance [13]. Due to the heterogeneity of this demographic, perinatal exposures and difference  
78 in the quantity and quality of neonatal care between countries with developed and developing  
79 economies, the information from the former cannot be directly applied in understanding IVH  
80 implications on countries with developing economies such as Kenya. This study, therefore, hopes  
81 to contribute to the understanding of IVH and its implications in low income countries within the  
82 East Africa region and Western Kenya in particular. This was achieved by investigating the  
83 prevalence, factors associated and short-term outcomes of IVH among preterms in the newborn  
84 unit of a teaching hospital. We hope that the findings of this study will contribute to the body of  
85 knowledge that can lead to formulation of guidelines on screening for IVH in preterm neonates.  
86 This study therefore aimed to describe the prevalence, determinants and short-term outcomes of  
87 intraventricular haemorrhage (IVH) among preterm neonates in the new-born unit of a national  
88 teaching and referral hospital in Western Kenya. Specifically, it determined the proportion of  
89 preterm neonates with IVH, factors contributing to IVH among preterm neonates and the short-  
90 term (first 28 days) neonatal outcomes of those diagnosed with IVH at the newborn unit of Moi  
91 Teaching and Referral Hospital.

## 92 **Methodology**

93 The study adopted a prospective descriptive study design at the newborn unit of Moi Teaching and  
94 Referral Hospital (MTRH) in Western Kenya between March 2020 to March 2021. The hospital  
95 is the second largest teaching and referral hospital in Kenya with a catchment area of the Western,  
96 North and South Rift regions. It has the largest newborn unit with highly skilled specialists in  
97 neonatology, paediatrics, neurology and neurosurgery; making it the most appropriate setting for  
98 a study on neonatal intraventricular haemorrhage. The neonates were sampled systematically  
99 (k=2) and both their clinical characteristics and that of their mothers collected from medical

100 records. Each neonate then underwent cUS screening by a trained paediatric resident on the third  
101 and fourteenth day of life using a 6.5 MHz transducer and the cranial images reviewed by a  
102 radiologist. Serial weekly measurements of head circumference were then done to determine  
103 outcome of hydrocephalus and daily monitoring for occurrence of death within 28 days of life or  
104 on discharge. The data collected was analysed descriptively as proportions and a bivariate analysis  
105 was conducted to test for association between patient characteristics, occurrence of IVH and early  
106 outcomes using statistical package for social sciences (SPSS) version 24. Multivariate logistic  
107 regression was conducted to control for confounders if the bivariate analysis was statistically  
108 significant ( $p \leq 0.05$ ). Odds ratios were computed at 95% confidence interval. Written informed  
109 parental consents were obtained from all the mothers prior to enrolling their neonates. This study  
110 received ethical approval from the independent research and ethics committee (IREC) of Moi  
111 University School of Medicine and Moi Teaching and Referral Hospital (Approval number:  
112 0001994).

113

## 114 **Results**

115 This study enrolled 201 pre-term neonates of whom 105 (52.2%) were male. The mean birthweight  
116 of the neonates was 1251.9 ( $\pm 185.4$ ) grammes with 182 (90.6%) being between 1000-1500  
117 grammes. The APGAR score was obtained at five minutes and 42 (20.9%) neonates had a low 5-  
118 minute APGAR score (below 7). Majority (60.2%) of the newborns had respiratory distress  
119 syndrome (RDS) and 116 (57.7%) were on mechanical ventilation. Nearly all (99%) of the  
120 newborns had a normal haemoglobin concentration ( $\geq 12$  g/dl) and 178 (88.6%) had a normal  
121 platelet count ( $\geq 150000/\mu\text{L}$ ) while 114 (56.7%) had a very low gestational age ( $< 32$  weeks) at the  
122 time of birth (Table 1).

## 123 **Table 1: Neonatal characteristics**

| Variable                   | Category           | Frequency (N)  | Percentage (%) |
|----------------------------|--------------------|----------------|----------------|
| Sex                        | Male               | 105            | 52.2           |
|                            | Female             | 96             | 47.8           |
| Birth weight (grams)       | <1000              | 19             | 9.4            |
|                            | 1000-1500          | 182            | 90.6           |
|                            | Mean (SD)          | 1251.9 (185.4) |                |
| Apgar score (at 5 minutes) | ≤3                 | 2              | 1.0            |
|                            | 4 – 6              | 40             | 19.9           |
|                            | 7 – 10             | 150            | 74.6           |
|                            | Unknown            | 9              | 4.5            |
| RDS                        | No                 | 80             | 39.8           |
|                            | Yes                | 121            | 60.2           |
| Platelets (#/μL)           | ≥150000 (Normal)   | 178            | 88.6           |
|                            | <150000 (abnormal) | 23             | 11.4           |
| Hb (g/dl)                  | ≥12 (normal)       | 199            | 99.0           |
|                            | <12 (low)          | 2              | 1.0            |
| GA (weeks)                 | < 28               | 3              | 1.5            |
|                            | 28 – 31            | 111            | 55.2           |
|                            | 32 – 34            | 87             | 43.3           |
| Mechanical ventilation     | No                 | 85             | 42.3           |
|                            | Yes                | 116            | 57.7           |

124  
125 The most common (39.8%) age group for the women whose newborns were enrolled in the study  
126 was 22-28 years and majority (54.2%; n=109) of all the new mothers had a parity of one. Only 43  
127 (21.4%) used antenatal steroids during the antenatal period, 190 (94.5%) gave birth in a hospital  
128 setting of which 58 (28.9%) of all the births being caesarean sections (Table 2).  
129

130 **Table 2: Maternal characteristics**

| Variable                  | Category                | Frequency (N) | Percentage (%) |
|---------------------------|-------------------------|---------------|----------------|
| Age (years)               | 14 – 21                 | 72            | 35.8           |
|                           | 22 – 28                 | 80            | 39.8           |
|                           | 29 – 35                 | 30            | 14.9           |
|                           | 36 – 42                 | 19            | 9.5            |
| Parity                    | 1                       | 109           | 54.2           |
|                           | 2                       | 41            | 20.4           |
|                           | 3                       | 36            | 17.9           |
|                           | >3                      | 15            | 7.5            |
| Place of delivery         | Hospital                | 190           | 94.5           |
|                           | Home                    | 11            | 5.5            |
| Use of antenatal steroids | Yes                     | 43            | 21.4           |
|                           | No                      | 158           | 78.6           |
| Delivery mode             | Caesarean section       | 58            | 28.9           |
|                           | Breech vaginal delivery | 2             | 1.0            |
|                           | Vertex vaginal delivery | 141           | 70.1           |

131  
132 The prevalence of IVH among low-birthweight newborns at Moi Teaching and Referral Hospital  
133 in Western Kenya was 33.8% (n=68). Of these, 51.4% (n=35) were classified as Grade I using the  
134 Papile’s grading system for IVH; while there were equal proportions of newborns with Grades II,  
135 III and IV at 16.2% (n=11) each.  
136 We report that the use of antenatal steroids significantly reduced the risk of IVH (RR=0.111; 95%  
137 CI: 0.028, 0.436; p<0.001) while extreme and very low gestational age below 32 weeks  
138 (RR=1.968; 95% CI: 1.255, 3.087; p=0.002) as well as an extremely low birthweight (RR=3.448;  
139 95% CI:2.662, 4.467; p<0.001) significantly increased the risk of IVH two and three-fold  
140 respectively. We also noted that neonates on mechanical ventilation (RR=2.502; 95% CI: 1.658,  
141 3.774; p<0.001) and had thrombocytopenia (RR=2.006; 95% CI: 1.350, 2.982; p=0.005) were

142 significantly more likely to be diagnosed with IVH. However, there was no statistically significant  
 143 association between maternal age, place of delivery and gender of baby with a diagnosis of  
 144 intraventricular haemorrhage (Table 3).

145

146 **Table 3: Maternal and Neonatal Factors Associated with intraventricular haemorrhage.**

| Maternal and Neonatal Factors |                   | IVH Presence |            | Total | p-value | RR (95% CI:)         |
|-------------------------------|-------------------|--------------|------------|-------|---------|----------------------|
|                               |                   | Yes          | No         |       |         |                      |
| Mother's Age (years)          | 14-21             | 22 (30.6)    | 50 (69.4)  | 72    | 0.344   |                      |
|                               | 22-28             | 28 (35.0)    | 52 (65.0)  | 80    |         |                      |
|                               | 29-35             | 9 (30.0)     | 21(70.0)   | 30    |         |                      |
|                               | 36-42             | 9 (47.4)     | 10 (52.6)  | 19    |         |                      |
| Place of Delivery             | Hospital          | 63 (33.2)    | 127 (66.8) | 190   | 0.514   | 0.729 (0.370, 1.437) |
|                               | Home              | 5 (45.5)     | 6 (54.5)   | 11    |         |                      |
| Use of Antenatal Steroids     | Yes               | 2 (4.7)      | 41 (95.3)  | 43    | <0.001  | 0.111 (0.028, 0.436) |
|                               | No                | 66 (41.8)    | 92 (58.2)  | 158   |         |                      |
| Mode of Delivery              | Vaginal           | 50 (35.0)    | 93 (65.0)  | 143   | 0.625   | 1.127 (0.723, 1.756) |
|                               | Caesarian Section | 18 (31.0)    | 40 (69.0)  | 58    |         |                      |
| Gender of Baby                | Male              | 35 (33.3)    | 70 (66.7)  | 105   | 0.883   | 0.970 (0.659, 1.428) |
|                               | Female            | 33 (34.4)    | 63 (65.6)  | 96    |         |                      |
| Gestation Age (Ballard Score) | <32 weeks         | 49 (43.0)    | 65 (57.0)  | 114   | 0.002   | 1.968 (1.255, 3.087) |
|                               | 32-34 weeks       | 19 (21.8)    | 68 (78.2)  | 87    |         |                      |
| Birthweight                   | ELBW              | 18 (94.7)    | 1 (5.3)    | 19    | <0.001  | 3.448 (2.662, 4.467) |
|                               | VLBW              | 50 (27.5)    | 132 (72.5) | 182   |         |                      |
| Mechanical Ventilation        | Yes               | 44 (51.8)    | 41 (48.2)  | 85    | <0.001  | 2.502 (1.658, 3.774) |
|                               | No                | 24 (20.7)    | 92 (79.3)  | 116   |         |                      |
| Platelets                     | Thrombocytopenia  | 14 (60.9)    | 9 (39.1)   | 23    | 0.005   | 2.006 (1.350, 2.982) |
|                               | Normal            | 54 (30.3)    | 124 (69.7) | 178   |         |                      |

147 Neonates with IVH were more likely to die if they were diagnosed with thrombocytopenia  
 148 (RR=3.306; 95% CI: 1.320, 8.283; p=**0.020**) compared to those with a normal platelet count. Those  
 149 born in hospital were less likely (RR=0.952; 95% CI: 0.153, 5.910) to die compared to those born  
 150 at home, however, this relationship was not statistically significant. Vaginal mode of delivery was  
 151 significantly associated with reduced risk (RR=0.348; 95% CI: 0.122, 0.990; p=**0.031**) of neonatal  
 152



153 mortality compared to caesarean sections. Neonates on mechanical ventilation, having a low  
 154 APGAR score (<7) and with an extremely low birthweight were not significantly associated with  
 155 mortality (Table 4).

156 **Table 4: Factors Associated with neonatal mortality in IVH**

|                        |                      | Mortality |           | Total | p-value      | RR (95% CI:)         |
|------------------------|----------------------|-----------|-----------|-------|--------------|----------------------|
|                        |                      | Died      | Survived  |       |              |                      |
| Gestational Age        | Extreme/Very Preterm | 6 (12.2)  | 8 (5.7)   | 14    | <b>0.036</b> | 0.332 (0.128, 0.862) |
|                        | Moderate Preterm     | 7 (13.0)  | 47 (87.0) | 54    |              |                      |
| Place of Delivery      | Hospital             | 12 (19.0) | 51 (81.0) | 63    | 0.958        | 0.952 (0.153, 5.910) |
|                        | Home                 | 1 (20.0)  | 4 (80.0)  | 5     |              |                      |
| Mode of Delivery       | Vaginal              | 6 (12.0)  | 44 (88.0) | 50    | <b>0.031</b> | 0.348 (0.122, 0.990) |
|                        | Caesarian Section    | 7 (38.9)  | 11 (61.1) | 18    |              |                      |
| APGAR                  | Low (<=7)            | 5 (19.2)  | 21 (80.8) | 26    | 0.771        | 1.166 (0.397, 3.424) |
|                        | High (>7)            | 8 (21.1)  | 30 (78.9) | 38    |              |                      |
| Mechanical Ventilation | Yes                  | 9 (20.5)  | 35 (79.5) | 44    | 0.709        | 1.227 (0.422, 3.569) |
|                        | No                   | 4 (16.7)  | 20 (83.3) | 24    |              |                      |
| Platelets              | Thrombocytopenia     | 6 (42.9)  | 8 (57.1)  | 14    | <b>0.020</b> | 3.306 (1.320, 8.283) |
|                        | Normal               | 7 (13.0)  | 47 (87.0) | 54    |              |                      |
| Birthweight            | ELBW (<1000g)        | 3 (16.7)  | 15 (83.3) | 18    | 0.758        | 0.853 (0.258, 2.691) |
|                        | VLBW (1000-1500g)    | 10 (20.0) | 40 (80.0) | 50    |              |                      |

157  
 158 **Discussion**

159 This study reports an IVH prevalence of 33.8% in a tertiary and teaching hospital in Western  
 160 Kenya where majority of preterm newborns diagnosed with the condition are referred for  
 161 management. Despite the mounting socioeconomic pressure intraventricular hemorrhage puts in  
 162 Kenya, this is one of the first studies done to increase the understanding of the condition and its  
 163 implications on this ever-growing high-risk population.

164 The prevalence finding is similar to that established in other low-income countries, such as Zambia  
 165 [14] and Uganda [15] with prevalence being slightly above a third in preterm neonates in both  
 166 studies. This similarity could be because these studies were carried out in similar setting (LMIC)

167 where resources are limited with need to improve perinatal care to put in measures to prevent  
168 occurrence of IVH in the preterm population.

169 This IVH prevalence finding is lower than that reported in a Polish prospective study [16] among  
170 108 newborns studied, a difference that could be attributed to a lower sample size in the Poznan  
171 University of Medical Sciences teaching hospital study. Although both studies were conducted at  
172 a teaching hospital, when a lower sample size is adopted, there is a greater likelihood of having a  
173 higher proportion of the factor of interest compared to findings in larger hospital or community-  
174 based studies conducted over a longer period. In a much larger retrospective study (N=3772)  
175 conducted in Canada [17], the prevalence of IVH was estimated at 8.3% which is much lower than  
176 the current study. This lower incidence could be attributed to both temporal and methodological  
177 differences in the two studies under consideration. The Canadian study [17] reviewed newborns  
178 admitted to seventeen neonatal intensive care units (NICUs) between the year 1996 and 1997 while  
179 this study was conducted between 2020 and 2021. Disease incidence and prevalence patterns have  
180 been demonstrated to vary over time and geographies. Furthermore, reviewing retrospectively  
181 findings in multiple facilities with a larger study population could lead to differences in  
182 proportions. Furthermore, the authors [17] noted a methodological limitation in their neuroimaging  
183 adoption rates across the multiple NICUs studied.

184 This study adopted the Papile's grading system [18,19] where Grade I represented subependymal  
185 haemorrhage, Grade II - intraventricular haemorrhage without dilation, Grade III -intraventricular  
186 haemorrhage with ventricular dilation and Grade IV - intraventricular haemorrhage with  
187 parenchymal haemorrhage; the most prevalent grade was Grade I at 51.4% with equal proportions  
188 for Grades II, III and IV at 16.2% each. This grade I finding, although lower than that reported in  
189 a study conducted in China [4] at 63.2%, shows a similar trend in the highest proportion by IVH

190 grade. However, there were contrasting findings in Grade II and III/IV at 12.3% and 24.1%  
191 respectively, a difference that could be attributed to the retrospective design of the study compared  
192 to the current study which adopted a prospective study design. Retrospective studies have been  
193 fraught with incomplete data and this could explain the merging of grades III and IV by the authors  
194 [4]. A second contrasting study in IVH grade proportions was the Polish study where the most  
195 prevalent grade reported by the authors [16] was Grade II at 37.3% followed by grade I at 21.6%.

196 This study identified maternal age, antenatal use of steroids by the expectant mother, mode of  
197 delivery (vaginal versus caesarean section), place of delivery (hospital or outborn), gestation age  
198 at birth, birthweight, and the neonate's gender as the probable risk factors for IVH. Use of antenatal  
199 steroids significantly reduced the risk of IVH (RR=0.111; 95% CI: 0.028, 0.436;  $p<0.001$ ) while  
200 extreme and very low gestational age below 32 weeks (RR=1.968; 95% CI: 1.255, 3.087;  $p=0.002$ )  
201 as well as an extremely low birthweight (RR=3.448; 95% CI: 2.662, 4.467;  $p<0.001$ ) significantly  
202 increased the risk of IVH two and three-fold respectively. Furthermore, neonates on mechanical  
203 ventilation (RR=2.502; 95% CI: 1.658, 3.774;  $p<0.001$ ) and had thrombocytopenia (RR=2.006;  
204 95% CI: 1.350, 2.982;  $p=0.005$ ) were significantly more likely to be diagnosed with IVH.

205 These findings match those of studies conducted in various countries. In Poland [16], having a low  
206 gestational age ( $p=0.0003$ ) and extremely low birthweight ( $p=0.0007$ ) significantly increased the  
207 risk of an IVH diagnosis. Similar to these findings, in Canada [17] gestational age of 27 to 28  
208 weeks increased the risk of IVH two-fold (RR=2.2; 95% CI: 1.5, 3.1) compared to those aged 29  
209 to 32 weeks. In France [20], the authors noted that gestational age ( $p=0.031$ ) of less than 30 weeks  
210 and lower percentile birthweight ( $p=0.0047$ ) were significantly associated with IVH.

211 Lastly, this study reports a mortality rate of 19.12% among newborns with IVH. This low mortality  
212 rate could be attributed to a high infant survival rate in Kenya following interventions aimed at

213 reducing preterm mortality rate from more than 50% in 2004 [21] to about 33% in 2019 [8]. Kenya  
214 is one of the most populous and developed countries in Sub-Saharan Africa and has witnessed an  
215 increased investment in healthcare infrastructure that has resulted in a remarkable increase in the  
216 survival rates of premature infants [22,23]. However, this improvement in access and quality of  
217 care has also caused the significant surge of complications related to preterm birth such as IVH in  
218 the country [1]. The study identified gestational age, place of delivery, use of antenatal steroids,  
219 mode of delivery, APGAR, birthweight and gender as the probable risk factors for death among  
220 newborns diagnosed with IVH. Of these thrombocytopenia (RR=3.306; 95% CI: 1.320, 8.283;  
221  $p=0.020$ ) was significantly associated with mortality. This is in contrast to the findings reported in  
222 Poland [16] where gestational age ( $p=0.0003$ ), low 5-minute APGAR ( $p=0.00013$ ) and very low  
223 birthweight ( $p=0.0007$ ) were statistically associated with mortality. In the current study, neonates  
224 with extremely or very low gestational age (<32 weeks gestation) were significantly more likely  
225 to survive (RR=0.332; 95% CI: 0.128, 0.862;  $p=0.036$ ) compared to those with a moderately low  
226 gestation age (32-34 weeks). This could be attributed to the fact that three quarters (75.5%) of  
227 these extremely or very low gestational age newborns were on mechanical ventilation compared  
228 to 36.8% of those with a moderately low gestation age.

229 In a study conducted in France [20], a low gestational age at birth ( $p=0.002$ ) was significantly  
230 associated with mortality while use of antenatal steroids was not ( $p=0.230$ ). In the current study,  
231 none of the newborns whose mother used antenatal steroids died in the perinatal period. The  
232 increased likelihood of survival among neonates born of mothers who had taken antenatal steroids  
233 (OR=1.245; 95% CI: 1.105, 1.403) matches the findings reported in a Cochrane review [2] where  
234 treatment with antenatal corticosteroids (compared with placebo or no treatment) is associated with  
235 a reduction in the most serious pregnancy related adverse outcomes such as prematurity and

236 perinatal death. Corticosteroids use antenatally accelerate fetal lung maturation for women at risk  
237 of preterm birth [2].

238 In Canada [17], vaginal mode of delivery (OR=1.6; 95% CI: 1.2-2.0) and higher (>7) 5-minute  
239 APGAR (OR=1.6; 95% CI: 1.2-2.0) scores increased the likelihood of neonatal mortality among  
240 those diagnosed with IVH which is in contrast with the current study where vaginal delivery was  
241 protective. This difference could be attributed to the difference in the proportionate uptake of  
242 vaginal delivery in countries with developing economies and those with developed economies.  
243 Higher vaginal deliveries are reporting in these developing economies as most births are  
244 supervised and conducted by midwives -who cannot offer caesarean section services – compared  
245 to the higher obstetrician to patient ratios in developed countries such as Canada. Finally, this  
246 study is limited by the fact that it did not follow-up on the early outcomes of neonates without  
247 intraventricular hemorrhage to determine its causality.

## 248 **Conclusions and Recommendations**

249 We report an intraventricular haemorrhage incidence among one-third of preterm neonates  
250 admitted at a teaching hospital in Western Kenya. Majority of the neonates with intraventricular  
251 haemorrhage presented with lower grades of the condition. Their risk of being diagnosed with the  
252 condition significantly increased among neonates with very low gestational age and extremely low  
253 birthweight; however, it was significantly lower among those neonates whose mothers had taken  
254 antenatal steroids. Mortality rates were significantly higher among neonates with both  
255 intraventricular haemorrhage and thrombocytopenia. We recommend enhanced antenatal steroid  
256 use among mothers at risk of having preterm deliveries and newborns with intraventricular  
257 hemorrhage. Future studies should follow-up both neonates with and without intraventricular  
258 hemorrhage to determine causality.

259 **Acknowledgements**

260 The authors would like to thank the mothers and the neonates who participated in this study.

261 Secondly, we are grateful to the management of Moi University School of Medicine and Moi

262 Teaching and Referral Hospital for allowing us to use their facilities to conduct the study.

263 **References**

- 264 1. Luo J, Luo Y, Zeng H, Reis C, Chen S. Research Advances of Germinal Matrix  
265 Hemorrhage: An Update Review. *Cell Mol Neurobiol.* 2019;39: 1–10. doi:10.1007/s10571-  
266 018-0630-5
- 267 2. Roberts D, Brown J, Medley N, Dalziel SR. Antenatal corticosteroids for accelerating fetal  
268 lung maturation for women at risk of preterm birth. *Cochrane Database Syst Rev.*  
269 2017;2017.  
270 doi:10.1002/14651858.CD004454.PUB3/MEDIA/CDSR/CD004454/REL0003/CD00445  
271 4/IMAGE\_N/NCD004454-CMP-001.66.SVG
- 272 3. Ballabh P. Pathogenesis and Prevention of Intraventricular Hemorrhage. *Clin Perinatol.*  
273 2014;41: 47–67. doi:10.1016/J.CLP.2013.09.007
- 274 4. Wu T, Wang Y, Xiong T, Huang S, Tian T, Tang J, et al. Risk factors for the deterioration  
275 of periventricular–intraventricular hemorrhage in preterm infants. *Sci Reports* 2020 101.  
276 2020;10: 1–8. doi:10.1038/s41598-020-70603-z
- 277 5. Egesa WI, Odoch S, Odong RJ, Nakalema G, Asiiimwe D, Ekuk E, et al. Germinal Matrix-  
278 Intraventricular Hemorrhage: A Tale of Preterm Infants. *Int J Pediatr (United Kingdom).*  
279 2021;2021. doi:10.1155/2021/6622598
- 280 6. Roberts JC, Javed MJ, Hocker JR, Wang H, Tarantino MD. Risk factors associated with  
281 intraventricular hemorrhage in extremely premature neonates. *Blood Coagul Fibrinolysis.*  
282 2018;29: 25–29. doi:10.1097/MBC.0000000000000661
- 283 7. WHO. Preterm birth - Key Facts. Geneva; 2018 Feb. Available: [https://www.who.int/news-](https://www.who.int/news-room/fact-sheets/detail/preterm-birth#)  
284 [room/fact-sheets/detail/preterm-birth#](https://www.who.int/news-room/fact-sheets/detail/preterm-birth#)
- 285 8. UNICEF. Ending preventable newborn deaths and stillbirths by 2030. 2020 [cited 4 Feb  
286 2022]. Available: [https://data.unicef.org/resources/ending-preventable-newborn-deaths-](https://data.unicef.org/resources/ending-preventable-newborn-deaths-and-stillbirths-by-2030/)  
287 [and-stillbirths-by-2030/](https://data.unicef.org/resources/ending-preventable-newborn-deaths-and-stillbirths-by-2030/)
- 288 9. Ki-moon B, Ki B. UN Sustainable Development Goals: Blueprint for a Better Future.  
289 *PENSEE Spec Issue.* 2018.
- 290 10. GOK. Kenya Vision 2030: Third Medium Term Plan (2018-2022). Transform Lives Adv  
291 socio-economic Dev through “Big Four.” 2018.
- 292 11. Wallau CAK, Costa-Nobre DT, Leslie ATFS, Guinsburg R. Impact of bundle  
293 implementation on the incidence of peri/intraventricular hemorrhage among preterm  
294 infants: A pre-post interventional study. *Sao Paulo Med J.* 2021;139: 251–258.  
295 doi:10.1590/1516-3180.2020.0412.R1.28012021

- 296 12. Siffel C, Kistler KD, Sarda SP. Global incidence of intraventricular hemorrhage among  
297 extremely preterm infants: A systematic literature review. *J Perinat Med.* 2021;49: 1017–  
298 1026. doi:10.1515/jpm-2020-0331
- 299 13. Moxon SG, Ruysen H, Kerber KJ, Amouzou A, Fournier S, Grove J, et al. Count every  
300 newborn; A measurement improvement roadmap for coverage data. *BMC Pregnancy*  
301 *Childbirth.* 2015;15: 1–23. doi:10.1186/1471-2393-15-S2-S8/FIGURES/10
- 302 14. Mulindwa MJ, Sinyangwe S, Chomba E. The Prevalence of Intraventricular Haemorrhage  
303 and Associated Risk Factors in Preterm Neonates in the Neonatal Intensive Care Unit at the  
304 University Teaching Hospital, Lusaka, Zambia. *Med J Zambia.* 2012;39: 16–21.  
305 doi:10.4314/MJZ.V39I1
- 306 15. MacLeod R, Paulson JN, Okalany N, Okello F, Acom L, Ikiror J, et al. Intraventricular  
307 haemorrhage in a Ugandan cohort of low birth weight neonates: the IVHU study. *BMC*  
308 *Pediatr.* 2021;21: 1–10. doi:10.1186/s12887-020-02464-4
- 309 16. Szpecht D, Al-Saad SR, Karbowski LM, Kosik K, Kurzawińska G, Szymankiewicz M, et  
310 al. Role of Fibronectin-1 polymorphism genes with the pathogenesis of intraventricular  
311 hemorrhage in preterm infants. *Child’s Nerv Syst.* 2020;36: 1729–1736.  
312 doi:10.1007/s00381-020-04598-3
- 313 17. Synnes AR, MacNab YC, Qiu Z, Ohlsson A, Gustafson P, Dean CB, et al. Neonatal  
314 intensive care unit characteristics affect the incidence of severe intraventricular hemorrhage.  
315 *Med Care.* 2006;44: 754–759. doi:10.1097/01.mlr.0000218780.16064.df
- 316 18. Valdez Sandoval P, Hernández Rosales P, Quiñones Hernández DG, Chavana Naranjo EA,  
317 García Navarro V. Intraventricular hemorrhage and posthemorrhagic hydrocephalus in  
318 preterm infants: diagnosis, classification, and treatment options. *Child’s Nerv Syst.*  
319 2019;35: 917–927. doi:10.1007/s00381-019-04127-x
- 320 19. Papile LA, Burstein J, Burstein R, Koffler H. Incidence and evolution of subependymal and  
321 intraventricular hemorrhage: A study of infants with birth weights less than 1,500 gm. *J*  
322 *Pediatr.* 1978;92: 529–534. doi:10.1016/S0022-3476(78)80282-0
- 323 20. Gilard V, Chadie A, Ferracci FX, Brasseur-Daudruy M, Proust F, Marret S, et al. Post  
324 hemorrhagic hydrocephalus and neurodevelopmental outcomes in a context of neonatal  
325 intraventricular hemorrhage: An institutional experience in 122 preterm children. *BMC*  
326 *Pediatr.* 2018;18. doi:10.1186/S12887-018-1249-X
- 327 21. UNICEF W. Low birth weight: Country. *Reg Glob Estim Child Info Rep.* 2004.
- 328 22. Njuguna FM, Kiptoon P, Nyandiko W. An assessment of the overall mortality of low birth  
329 weight neonates at the new birth units of the Moi Teaching and Referral hospital in Eldoret,  
330 Kenya. *Eur J Biol Med Sci Res.* 2016;4: 37–45. Available:  
331 <http://www.tjyybjb.ac.cn/CN/article/downloadArticleFile.do?attachType=PDF&id=9987>
- 332 23. Howson CP, Kinney M V., McDougall L, Lawn JE. Born Too Soon: Preterm birth matters.  
333 *Reprod Health.* 2013;10: 1–9. doi:10.1186/1742-4755-10-S1-S1/FIGURES/6
